# Supplementary material for: Determinants and patterns of care-seeking for childhood illness in rural Pune District, India
Source: PubMed Central journal article supplement (PMC7020658; doi:10.7189/jogh.10.010601), 2020-06

## Appendix I: Appendix Tables and Figures

**Figure S1: Participant Follow-up Schedule**

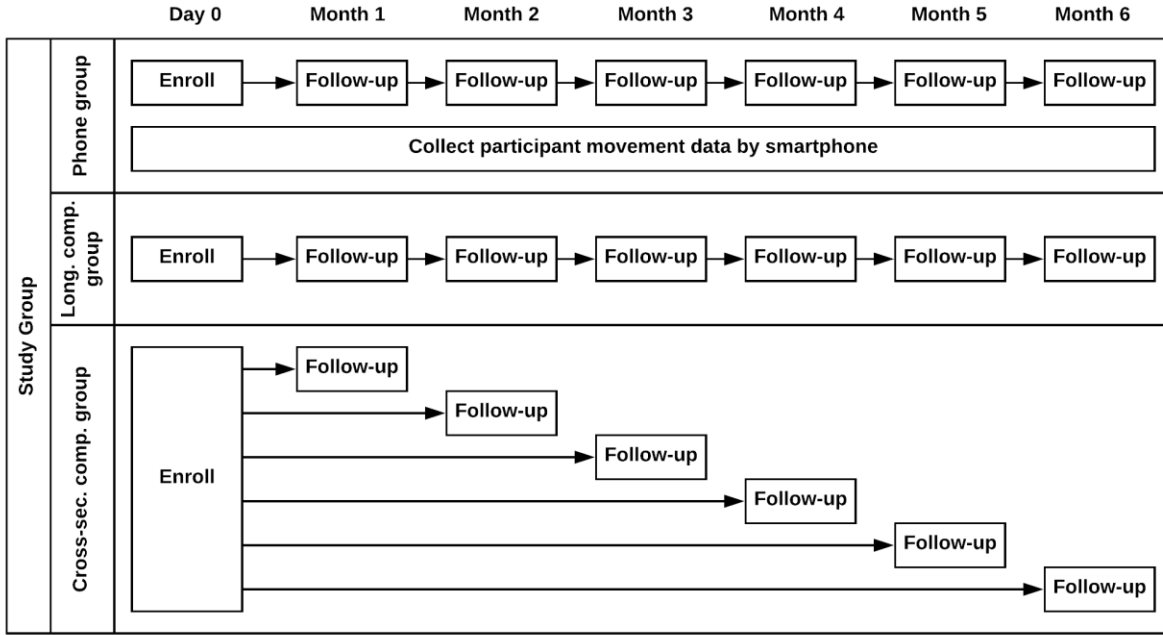

Cross-sec. comp. group - Cross-sectional Comparison Group; Long. comp. group - Longitudinal comparison group. Reproduced with permission from Hirve et al. (2018).

**Table S1. Illness characteristics of 658 childhood illness episodes reported between July 2015 and February 2016, rural Pune district, India**

| <b>Characteristic</b>                            | <b>N (%)</b> |
|--------------------------------------------------|--------------|
| Single symptom                                   | 263 (40)     |
| Diarrhea only                                    | 53 (8)       |
| Fever only                                       | 151 (23)     |
| Cough only                                       | 59 (9)       |
| Suspected ARI                                    | 3 (0)        |
| Multiple symptoms                                | 395 (60)     |
| Diarrhea, fever                                  | 37 (6)       |
| Diarrhea, cough                                  | 1 (0)        |
| Fever, cough                                     | 322 (49)     |
| Fever, Suspected ARI                             | 30 (5)       |
| Diarrhea, fever, cough                           | 35 (5)       |
| Diarrhea, fever, Suspected ARI                   | 7 (1)        |
| Presence of danger signs                         | 63 (10)      |
| Vomiting                                         | 41 (7)       |
| Difficulty eating                                | 12 (2)       |
| Child unusually sleepy/unconscious               | 5 (1)        |
| Lower chest in-drawing                           | 5 (1)        |
| Convulsions                                      | 0 (0)        |
| Perceived severity                               |              |
| Non-severe                                       | 32 (5)       |
| Moderately severe                                | 294 (47)     |
| Very severe                                      | 238 (38)     |
| Missing                                          | 94 (14)      |
| Status at follow-up interview                    |              |
| Resolved                                         | 403 (64)     |
| Not resolved                                     | 225 (36)     |
| Symptom onset, mean days prior to interview (SD) |              |
| Resolved episodes                                | 9 (4)        |
| Unresolved episodes                              | 5 (4)        |
| Illness duration*, mean days (SD)                | 4 (2)        |

\*Illness duration calculated for resolved episodes only

**Table S2. Multiply imputed univariate and multivariable logistic regression results of care-seeking for childhood illness between July 2015 to February 2016, rural Pune district, India**

| Characteristic                               | Unadjusted OR<br>(95% CI)     | Adjusted OR<br>(95% CI)       |
|----------------------------------------------|-------------------------------|-------------------------------|
| Multiple symptoms reported                   | 3.2 (2.2 - 4.5) <sup>†</sup>  | 2.5 (1.7 - 3.9) <sup>†</sup>  |
| Presence of danger signs                     | 3.1 (1.4 - 7.1) <sup>†</sup>  | See note                      |
| Illness perceived as moderate-to-very severe | 8.6 (5.5 - 13.4) <sup>†</sup> | 7.3 (4.2 - 12.9) <sup>†</sup> |
| Mother currently employed                    | 0.6 (0.4 - 0.9) <sup>‡</sup>  | 0.3 (0.2 - 0.7) <sup>†</sup>  |
| Interaction: severity x maternal employment  | N/A                           | 2.0 (0.7 - 5.6)               |
| Maternal education, completed years          |                               |                               |
| 0-7                                          | REF                           | REF                           |
| 8-9                                          | 1.7 (0.9 - 3.3)               | 1.7 (0.7 - 4.1)               |
| 10-11                                        | 1.2 (0.7 - 2.1)               | 1.1 (0.6 - 2.3)               |
| 12+                                          | 1.2 (0.7 - 2)                 | 1.0 (0.5 - 2.1)               |
| Child age, months                            | 1.0 (1.0 - 1.0)               | 1.0 (1.0 - 1.0)               |
| Child being female                           | 1.0 (0.7 - 1.5)               | 1.1 (0.7 - 1.7)               |
| Other children under-five in household       | 0.8 (0.6 - 1.2)               | 0.8 (0.5 - 1.2)               |
| Household structure                          |                               |                               |
| Extended                                     | REF                           | REF                           |
| Nuclear                                      | 0.8 (0.6 - 1.2)               | 0.7 (0.4 - 1.3)               |
| Religion of head of household                |                               |                               |
| Hindu                                        | REF                           | REF                           |
| Other                                        | 0.8 (0.5 - 1.3)               | 0.8 (0.4 - 1.5)               |
| Wealth quintile                              |                               |                               |
| Quintile 1 (lowest)                          | REF                           | REF                           |
| Quintile 2                                   | 1.3 (0.7 - 2.5)               | 1.2 (0.6 - 2.4)               |
| Quintile 3                                   | 1.3 (0.7 - 2.3)               | 1.6 (0.8 - 3.3)               |
| Quintile 4                                   | 1.1 (0.6 - 1.9)               | 1.0 (0.4 - 2.0)               |
| Quintile 5 (highest)                         | 1.4 (0.8 - 2.5)               | 1.7 (0.7 - 4.2)               |
| Covered by health scheme or health insurance | 1.4 (0.9 - 2.3)               | 1.8 (1.0 - 3.3) <sup>§</sup>  |
| Urban residence                              | 1.0 (0.7 - 1.5)               | 1.3 (0.7 - 2.4)               |
| Distance to nearest health facility          |                               |                               |
| <1 km                                        | REF                           | REF                           |
| 1-3 km                                       | 1.0 (0.6 - 1.4)               | 1.3 (0.8 - 2.2)               |
| >3km                                         | 1.4 (0.7 - 2.7)               | 1.5 (0.6 - 3.7)               |

CI - confidence interval; REF - reference group; km - kilometer

\* Presence of danger signs excluded from final model due to collinearity with other covariates. Confidence intervals estimated using robust standard errors.

<sup>†</sup>  $P < 0.01$ .

<sup>‡</sup>  $P < 0.05$ .

<sup>§</sup>  $P < 0.10$ .

**Table S3. Multiply imputed results for interaction between illness severity and maternal employment on care-seeking for childhood illness between July 2015 and February 2016, rural Pune district, India**

|                                                               | Illness severity                |                                        | <i>Effect of severity within<br/>employment strata</i><br>OR (95% CI) |
|---------------------------------------------------------------|---------------------------------|----------------------------------------|-----------------------------------------------------------------------|
|                                                               | Non-severe<br>OR (95% CI)       | Moderate-to-very severe<br>OR (95% CI) |                                                                       |
| <b>Maternal employment</b>                                    |                                 |                                        |                                                                       |
| Not currently employed                                        | 1.0<br>(Reference)              | 7.3<br>(4.2 - 12.9) <sup>†</sup>       | 7.3<br>(4.2 - 12.9) <sup>†</sup>                                      |
| Currently employed                                            | 0.3<br>(0.2 - 0.7) <sup>†</sup> | 4.6<br>(2.1 - 9.8) <sup>†</sup>        | 14.3<br>(5.9 - 34.6) <sup>†</sup>                                     |
| <i>Effect of employment status<br/>within severity strata</i> | 0.3<br>(0.2 - 0.7) <sup>†</sup> | 0.6<br>(0.3 - 1.4)                     |                                                                       |

OR - odds ratio; CI - confidence interval

\* Measure of interaction on multiplicative scale: ratio of ORs (95% CI) = 2.0 (0.7 - 5.6). ORs are adjusted for number of reported symptoms, maternal education, child age, child sex, household structure, religion of head of household, household SES, health insurance coverage, urban residence, and distance to nearest health facility. Confidence intervals estimated using robust standard errors.

<sup>†</sup>  $P < 0.01$ .

Figure S2: Comparison of selected regression results from multivariable model without imputation and with imputation

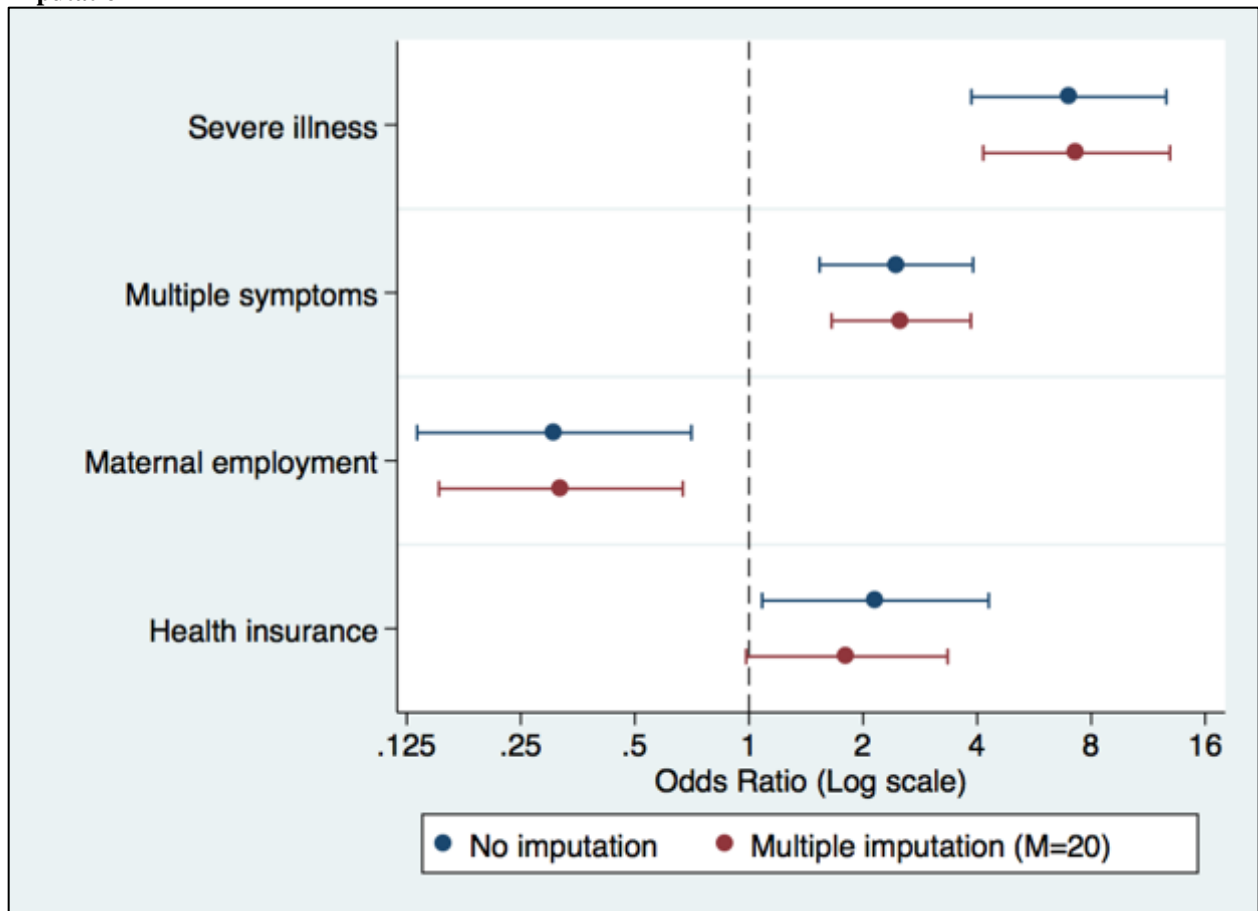

Supplement: jogh-10-010601-s001.pdf [file jogh-10-010601-s001.pdf]
